# Supplementary material for: A protein interaction map for cell-cell adhesion regulators identifies DUSP23 as a novel phosphatase for β-catenin
Source: PubMed Central journal article supplement (PMC4891818; doi:10.1038/srep27114), 2016-06-03
Supplement: srep27114-s1.pdf [file srep27114-s1.pdf]

## **A protein interaction map for cell-cell adhesion regulators identifies DUSP23 as a novel phosphatase for $\beta$ -catenin**

Lisa Leon Gallegos, Mei Rosa Ng, Mathew E. Sowa, Laura Selfors, Anne White, Ioannis K. Zervantonakis, Pragma Singh, Sabin Dhakal, J. Wade Harper, Joan S. Brugge

Supplemental Figures

**Figure S1. Loss of cell-cell adhesion phenotype upon knockdown of CCARP genes from previously published screen data (Simpson, et al., 2008).** (A) DIC images from timelapse analysis of scratch wound assay after transfection with control siRNA or siRNA to different CCARP genes. Top images are at 0 min after scratch wound, middle images are at 8 hours post-wounding, bottom images are at 18 hours post-wounding. (B) Phalloidin (green) and DAPI (blue) stained wound healing images for additional genes that were not characterized by timelapse analysis.

**Figure S2. Validation of selected novel protein interactions between CCAPPs and known cell-cell adhesion proteins.** Western blot analysis of anti-HA tag immunoprecipitated protein complexes from MCF10A cells expressing (A) HA-GFP, HA-TRIP6, or HA-CSNK1E using anti-TJP2 (top blot) or anti-HA (bottom blot) antibodies; (B) HA-GFP, HA-CTNNB1 or HA-CTNNB1 using anti-ARVCF (top blot) or anti-HA (bottom blot) antibodies; (C) HA-GFP, HA-CTNNB1 or HA-CTNNB1 using anti-CDH4 (top blot) or anti-HA (bottom blot) antibodies; (D) HA-GFP, HA-CTNNB1 or HA-CTNNB1 using anti-PKP4 (top blot) or anti-HA (bottom blot) antibodies; (E) HA-GFP, HA-STYXL1, HA-DUSP23, or HA-NEK8 using anti-JUP (top blot) or anti-HA (bottom blot) antibodies; (F) HA-GFP, HA-CSNK1G2, or HA-NEK8 using anti-DSG2 (top blot) or anti-HA (bottom blot) antibodies; (G) HA-GFP, HA-DUSP23, or HA-NEK8 using anti-CDH3 (top blot) or anti-HA (bottom blot) antibodies; (H) HA-GFP or HA-NEK8 using anti-CDH1 (top blot) or anti-HA (bottom blot) antibodies; (I) HA-GFP, HA-ACP1, or HA-NEK8 using anti-DSG3 (top blot) or anti-HA (bottom blot) antibodies; (J) HA-GFP or HA-ACP1 using anti-CTNNA1 (top blot) or anti-HA (bottom blot) antibodies; (K) HA-GFP, HA-CAV1, or HA-RIOK2 using anti-PHB (top blot) or anti-HA (bottom blot) antibodies; (L) HA-GFP, HA-ACP1, or HA-DUSP23 using anti-ITGB4 (top blot) or anti-HA (bottom blot) antibodies. Biological duplicate samples are run for each HA-tagged protein.

**Figure S3. Analysis of the specificity of the effects of DUSP23 knockdown on the phosphorylation of proteins in the cadherin-catenin complex.** (A) Western blot analysis of phospho-tyrosine of  $\delta$ -catenin (left blots) or  $\alpha$ -catenin (right blots) and associated proteins immunoprecipitated from MCF10A cells that were transfected with siRNA to GFP (negative control) or DUSP23, or treated with Vanadate, 1 mM, as a positive control. Upper blots were probed with a generic anti-p-Tyr antibody and the lower blots were probed with antibodies to  $\delta$ -catenin or  $\alpha$ -catenin. \* Indicates band at the appropriate molecular weight for  $\alpha$ - or  $\delta$ -catenin; # indicates bands corresponding to IgG. (B) Western blot analysis of specific pTyr residues on  $\beta$ -catenin: pTyr 86 (left blots),

pTyr 489 (middle blots), and pTyr 654 (right blots) from whole cell lysates or from immunoprecipitated  $\beta$ -catenin from MCF10A cells transfected with siRNAs to GFP (negative control) or DUSP23. Upper blots were probed with the appropriate anti-pTyr-specific antibody and the lower blots were probed with anti- $\beta$ -catenin antibody. \* Indicates band at the appropriate molecular weight for  $\beta$ -catenin; # indicates bands corresponding to IgG.

**Figure S4. Quantification of effects of DUSP23 knockdown on  $\beta$ -catenin membrane fractionation.** Quantification of  $\beta$ -catenin protein levels in the membrane fraction (normalized to E-cadherin levels) from immunoblot analysis of membrane and cytoplasmic fractions of cells transfected with siRNA to GFP (control) or DUSP23 (two duplexes; du. 01 and du. 02) corresponding to Fig. 4d. Quantification across three independent experiments showed no significant changes using multiple t-tests.

**Figure S5. Cell-matrix adhesion assay and method of assessing mature vs. “zipper-like” cell-cell adhesions.** (a) Adhesion assay of MCF10A cells to glass coated with fibronectin. Graph shows quantification of control cells (si-GFP) or DUSP23 knockdown cells (si-DUSP23, two duplexes) remaining adherent to fibronectin after adhesion for 10, 30, and 90 min, as indicated. N = 4 wells across two independent experiments. There are no significant differences amongst the conditions within the same time point; error bars represent S. D. (b) Image on the left showing a sub-confluent monolayer of MCF10A cells with both mature and immature cell-cell junctions stained for  $\beta$ -catenin. A line scan through a mature junction (dark blue line) shows one peak of staining intensity (dark blue graph on the right), while a line scan through a “zipper-like” junction (light blue line) shows two peaks of staining intensity (light blue graph on the right). (c) Graphs of average  $\beta$ -catenin staining intensity across all junctions measured for control cells and si-DUSP23 cells; black symbols represent mature cell-cell junctions, and grey symbols represent “zipper-like” cell-cell junctions.

**a**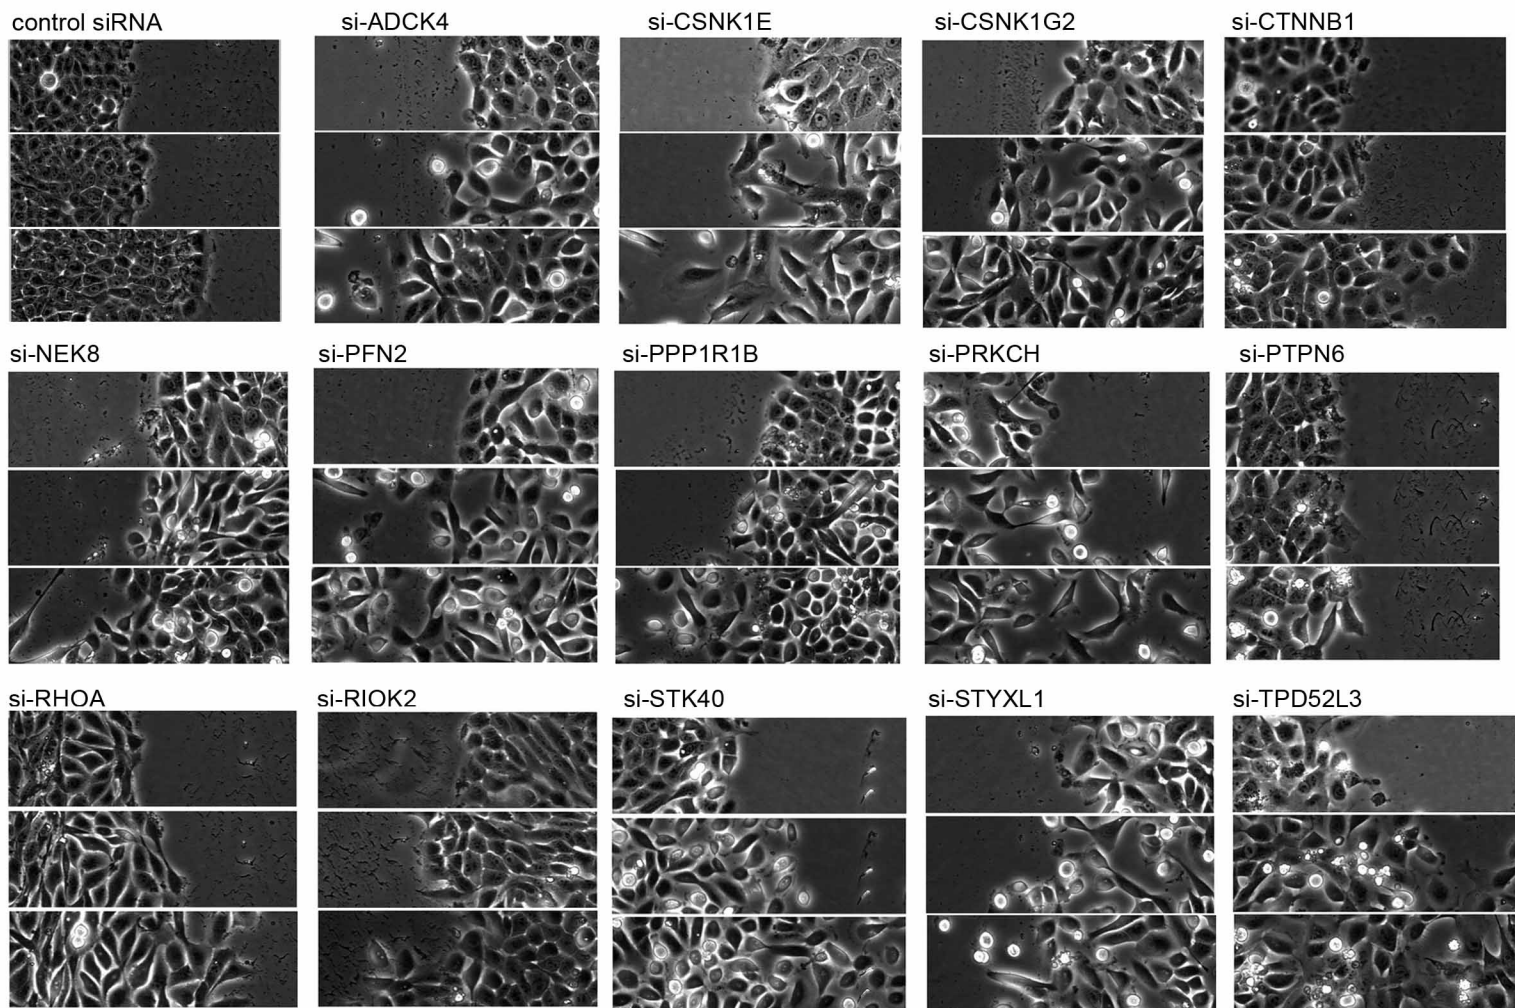**b**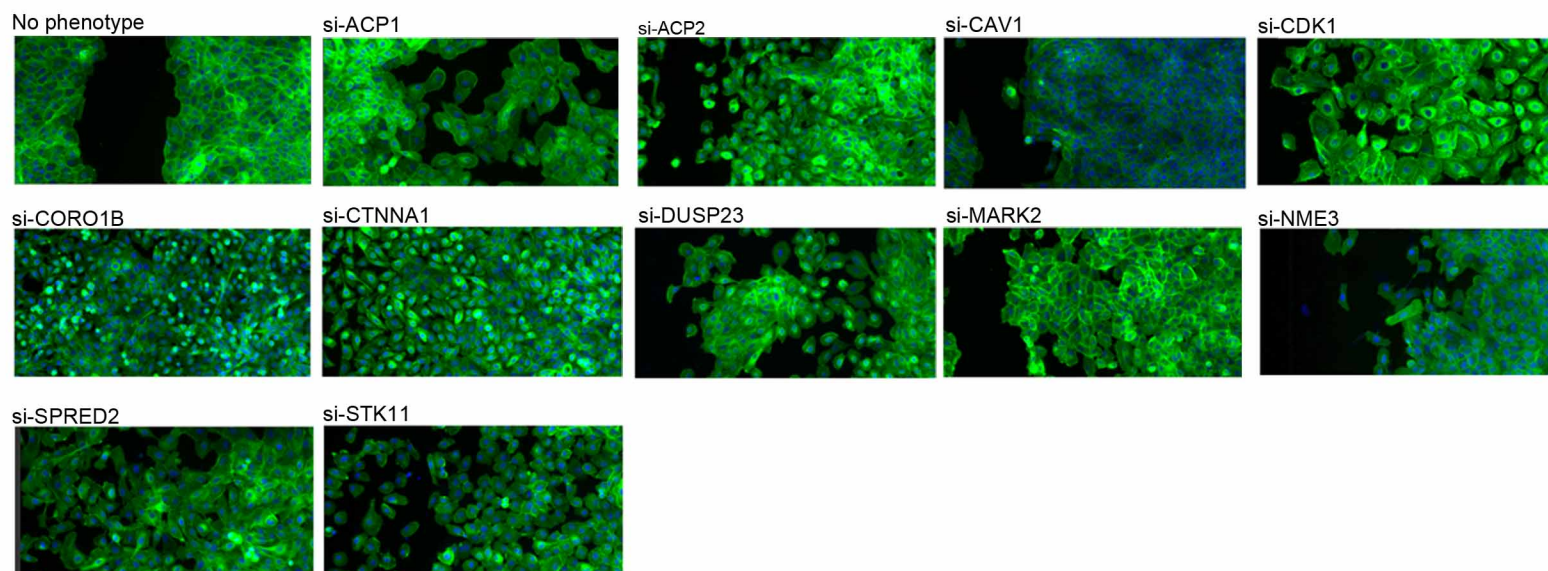

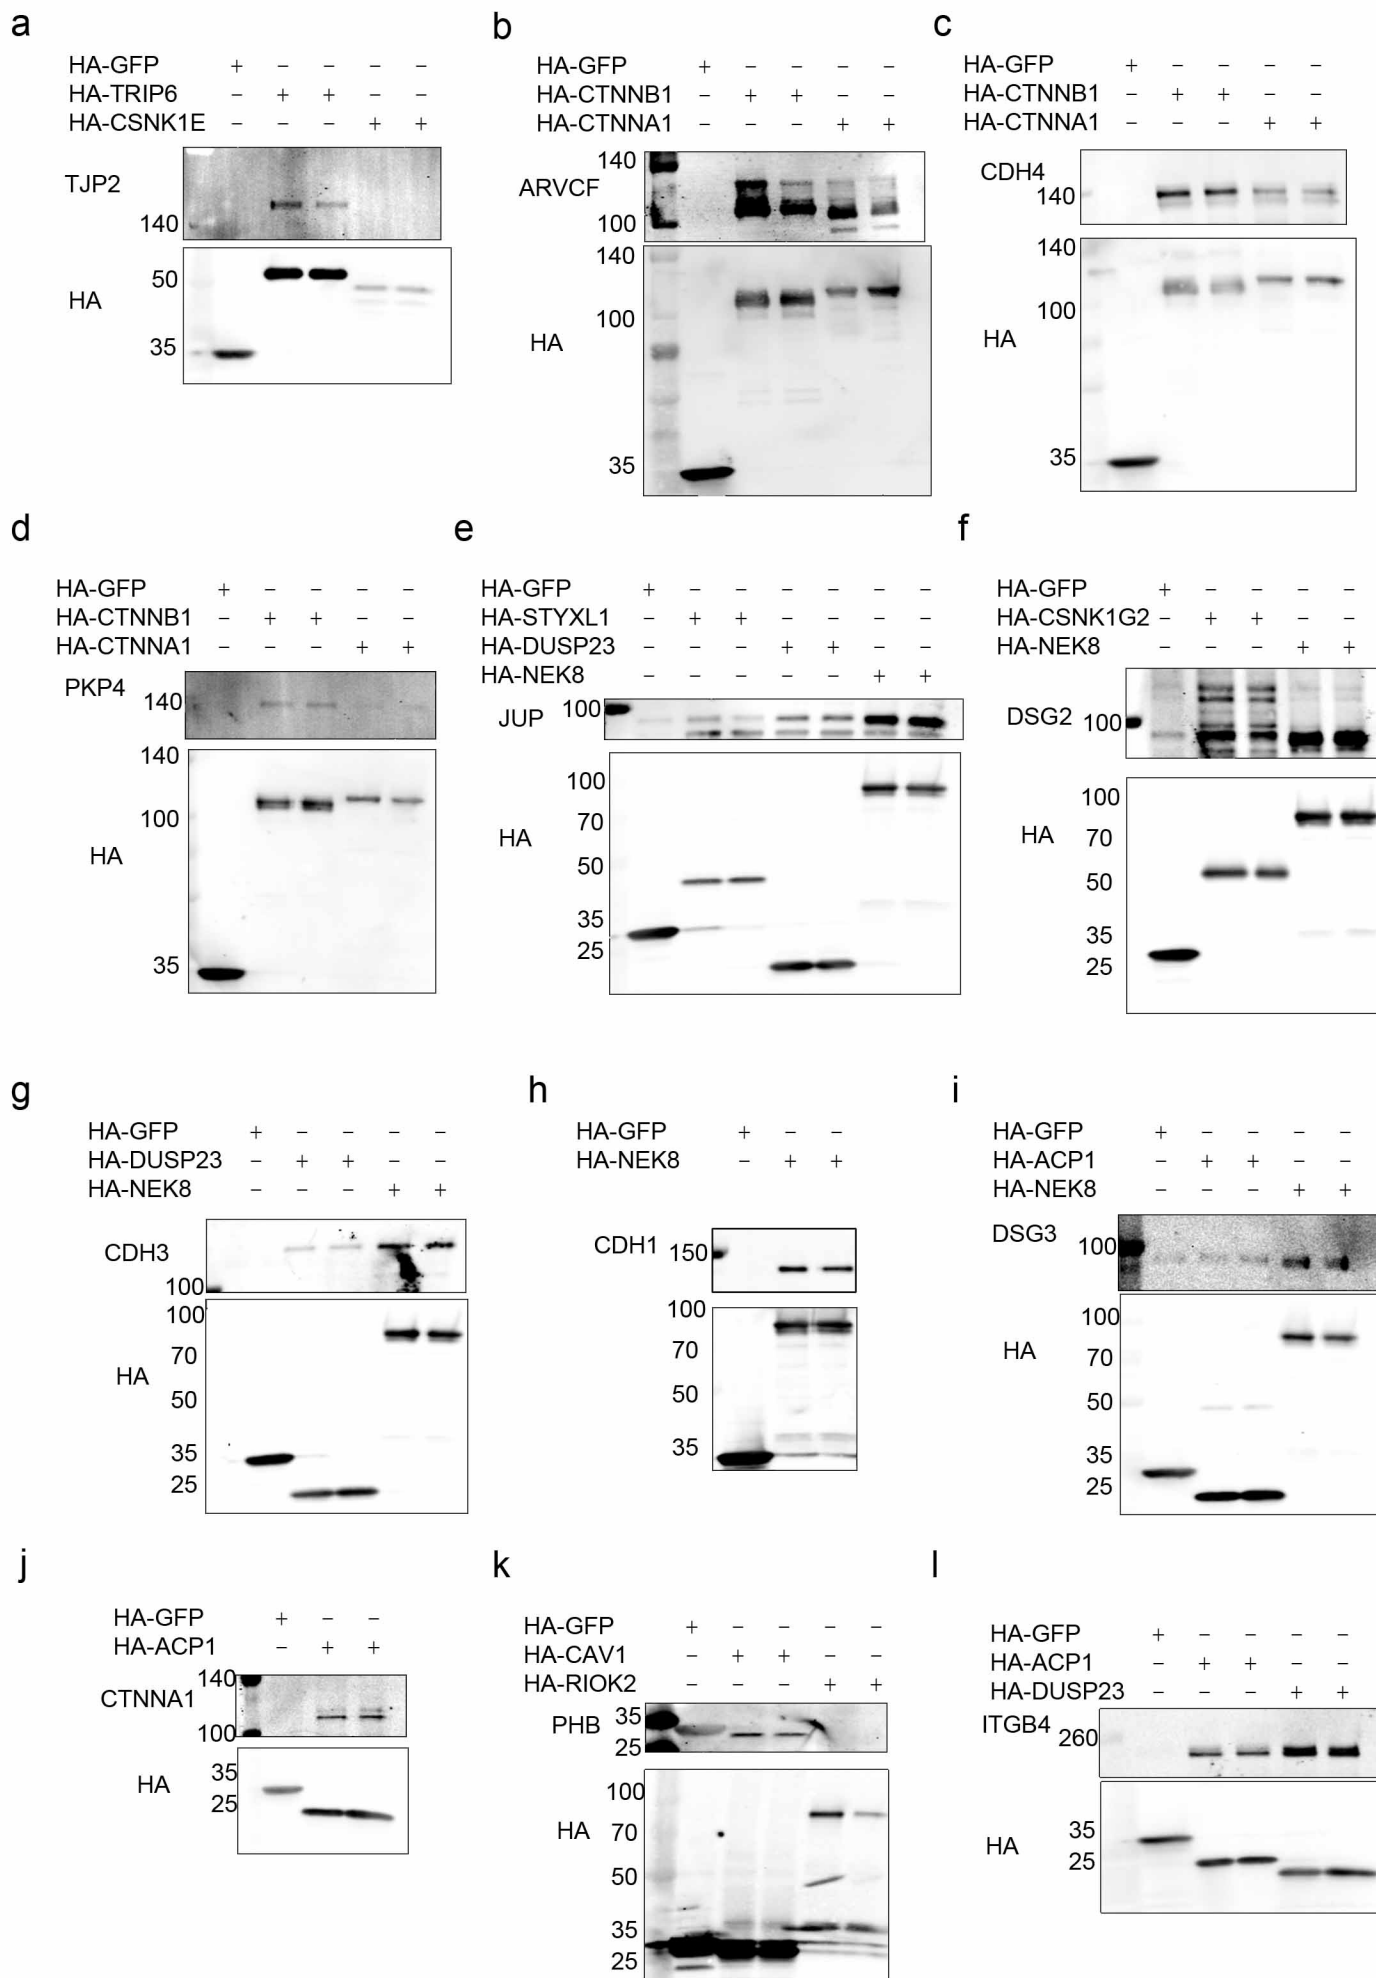

**a**

|                        |   |   |   |
|------------------------|---|---|---|
| si-GFP                 | + | - | - |
| si-DUSP23              | - | + | - |
| Vanadate, 1 mM, 30 min | - | - | + |

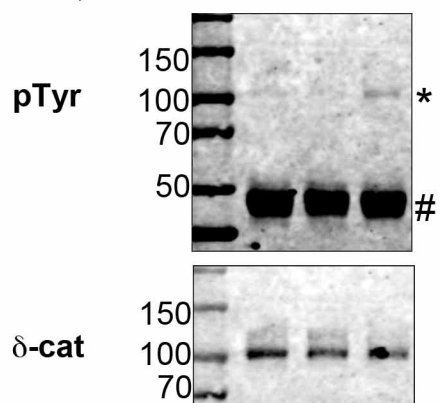

|                        |   |   |   |
|------------------------|---|---|---|
| si-GFP                 | + | - | - |
| si-DUSP23              | - | + | - |
| Vanadate, 1 mM, 30 min | - | - | + |

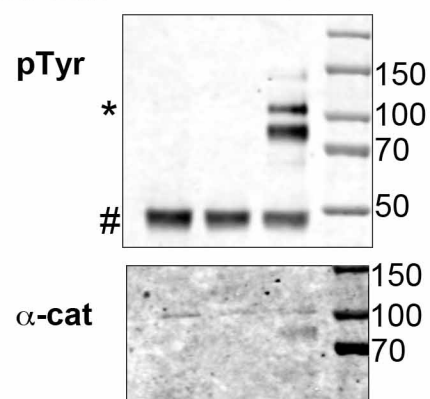

**b**

|                              |   |   |   |   |   |   |   |   |   |   |   |   |
|------------------------------|---|---|---|---|---|---|---|---|---|---|---|---|
| si-GFP (lysate)              | + | - | - | - | + | - | - | - | + | - | - | - |
| si-DUSP23 (lysate)           | - | + | - | - | - | + | - | - | - | + | - | - |
| si-GFP (IP- $\beta$ -cat)    | - | - | + | - | - | - | + | - | - | - | + | - |
| si-DUSP23 (IP- $\beta$ -cat) | - | - | - | + | - | - | - | + | - | - | - | + |

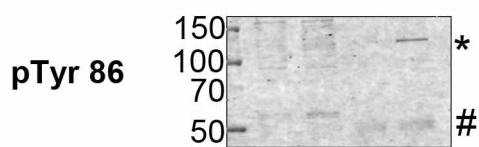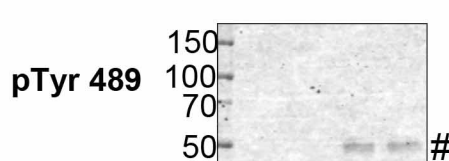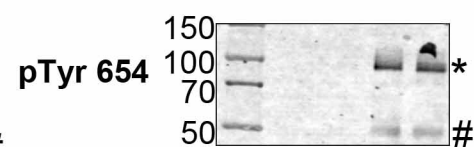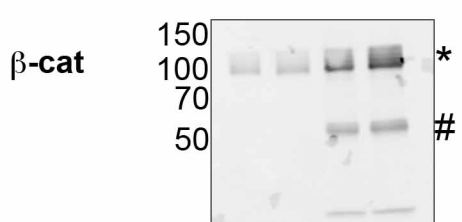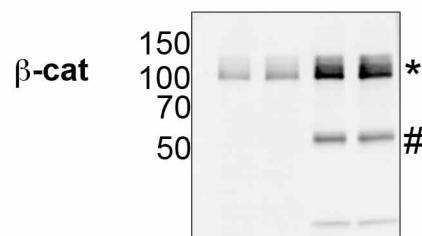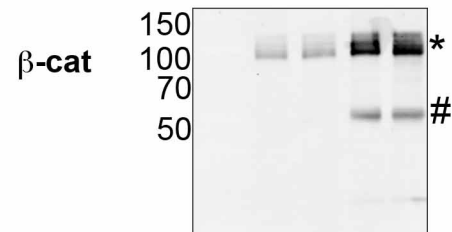

$\beta$ -cat/E-cad (membrane fraction)

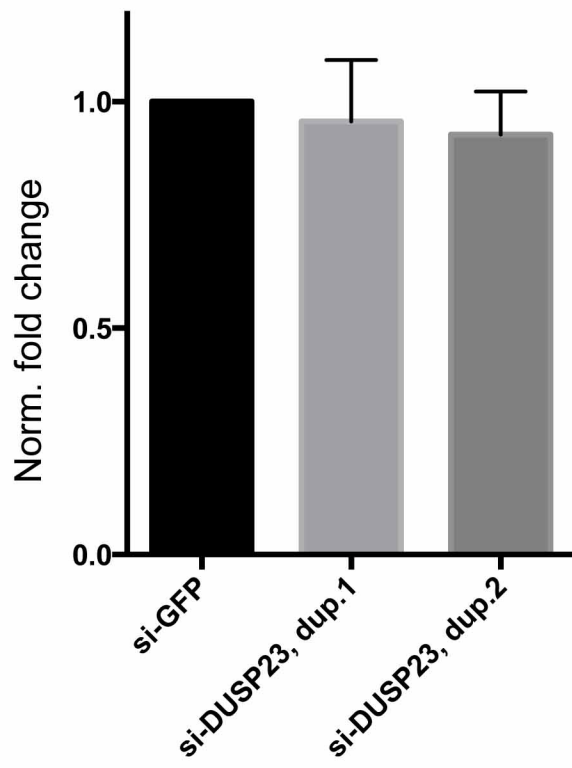



**a**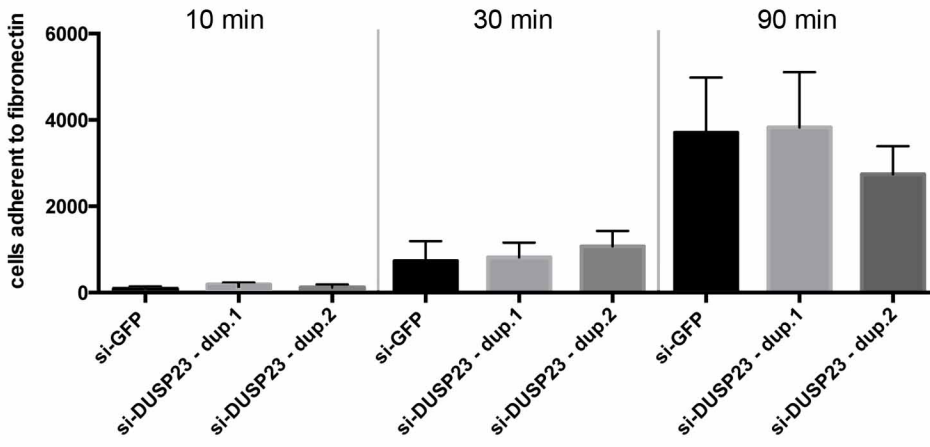**b**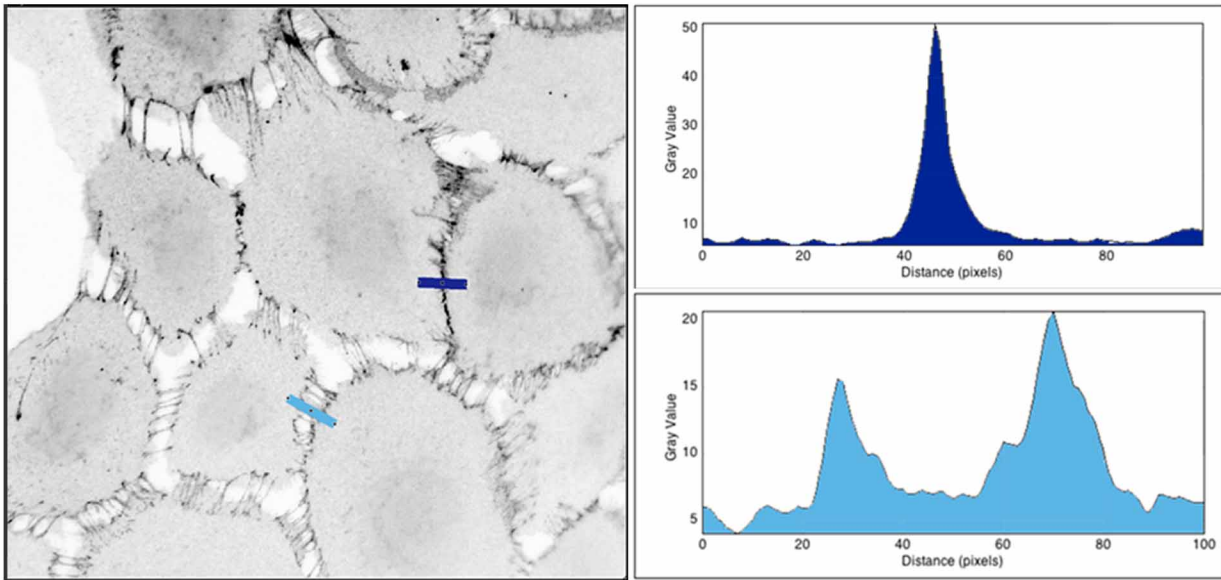**c**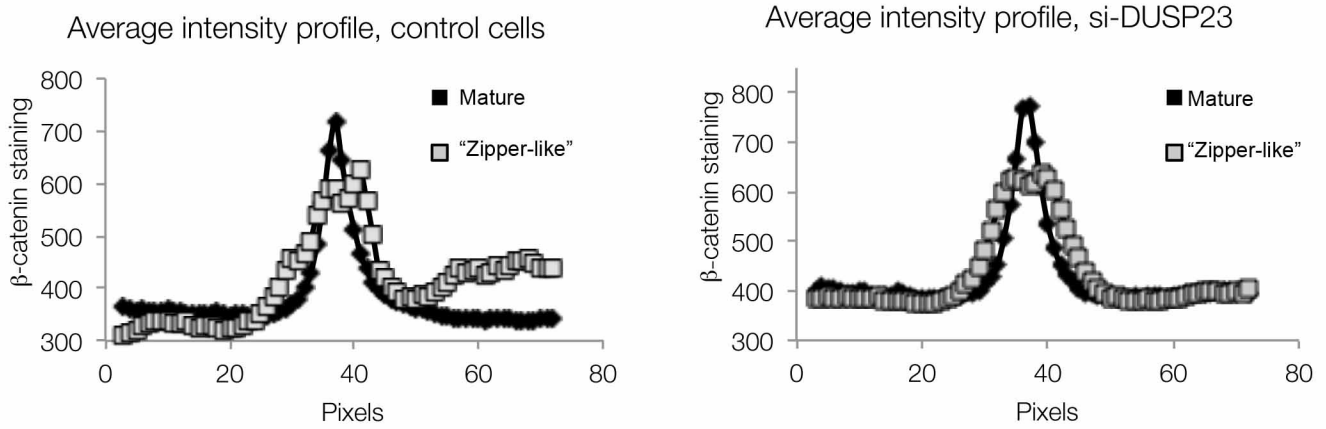

## Dataset Legends

**Supplemental Table, S1.** Table containing all of the interactions represented in Figure 1. The table also contains CompPASS scores for each interaction.

**Supplemental Table, S2.** Table containing the list of genes having cell-cell adhesion gene ontology. The databases used are also listed in this table.

**Supplemental Table, S3.** Comparison of the current study to previous unbiased studies of cell-cell adhesion genes or proteins.

**Supplemental Table, S4.** Table containing all CompPASS-scored interactors for each bait protein.

**Supplemental Table, S5.** Table containing all of the expression constructs used in this study.



## Supplemental Movie Captions

**Supplemental Movie, S1.** Movie clip of MCF10A cells transfected with siRNA targeting GFP spreading on glass coated with Fc-E-cadherin. Scale bar indicates 50  $\mu\text{m}$ .

**Supplemental Movie, S2.** Movie clip of MCF10A cells transfected with siRNA targeting DUSP23, duplex 1, spreading on glass coated with Fc-E-cadherin. Scale bar indicates 50  $\mu\text{m}$ .

**Supplemental Movie, S3.** Movie clip of MCF10A cells transfected with siRNA targeting DUSP23, duplex 2, spreading on glass coated with Fc-E-cadherin. Scale bar indicates 50  $\mu\text{m}$ .
